# Supplementary material for: Nitrogen doped carbon for Pd-catalyzed hydropurification of crude terephthalic acid: roles of nitrogen species
Source: Royal Society of Chemistry journal article supplement (doi:10.1039/d1ra06479g), 2021-01-01
Supplement: d1ra06479g1.pdf [file d1ra06479g1.pdf]

## Supporting Information for

### **Nitrogen doped carbon for Pd-catalyzed hydropurification of crude terephthalic acid: Roles of nitrogen species**

Limin He<sup>a</sup>, Yangdong Wang<sup>a</sup>, Huanxin Gao<sup>a</sup>, Zhicheng Liu<sup>a,\*</sup>, Zaiku Xie<sup>b,\*</sup>

<sup>a</sup> State Key Laboratory of Green Chemical Engineering and Industrial Catalysis, Shanghai Research Institute of Petrochemical Technology, SINOPEC Corp., Shanghai 201208, China.

<sup>b</sup> China Petrochemical Corporation (SINOPEC Group), Beijing 100728, China.

#### **Synthesis of other Pd/N\_AC catalysts**

The N doped AC samples with different hydrothermal reaction time (2 h, 10 h and 24 h) were also synthesized by the same hydrothermal process. Then, these N doped AC supported Pd catalysts were prepared by a wetness impregnation method. The obtained Pd catalysts were denoted as Pd/N\_AC-t, where t referred to the different hydrothermal reaction time (2 h, 10 h and 24 h).

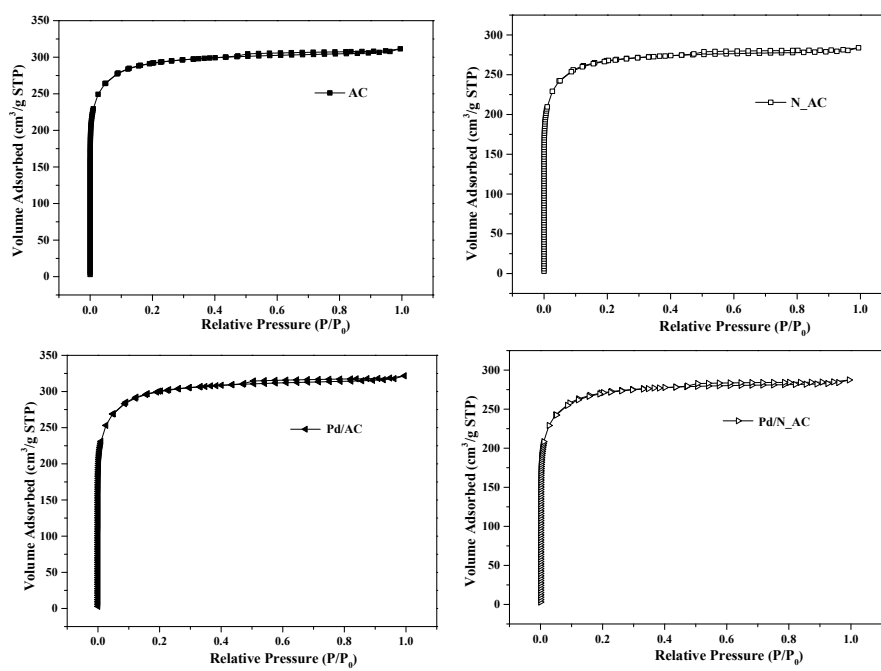

**Figure S1.** N<sub>2</sub> adsorption-desorption isotherms of AC, N\_AC, Pd/AC and Pd/N\_AC.

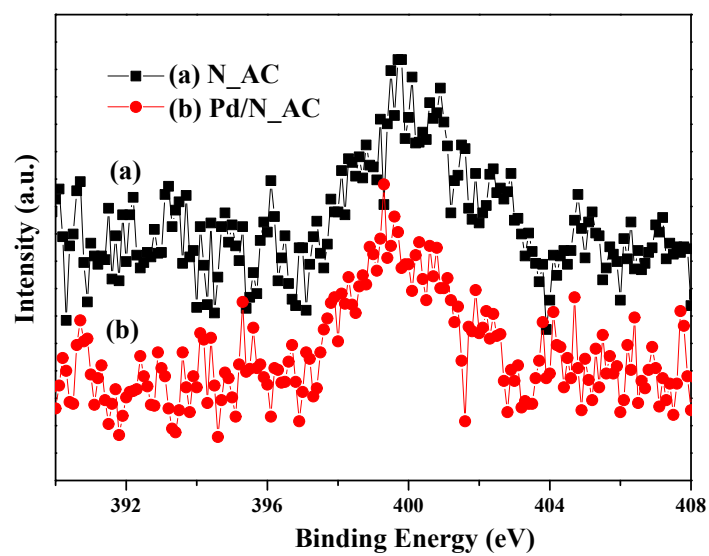

**Figure S2.** N1s XPS spectra of (a) N\_AC and (b) Pd/N\_AC.

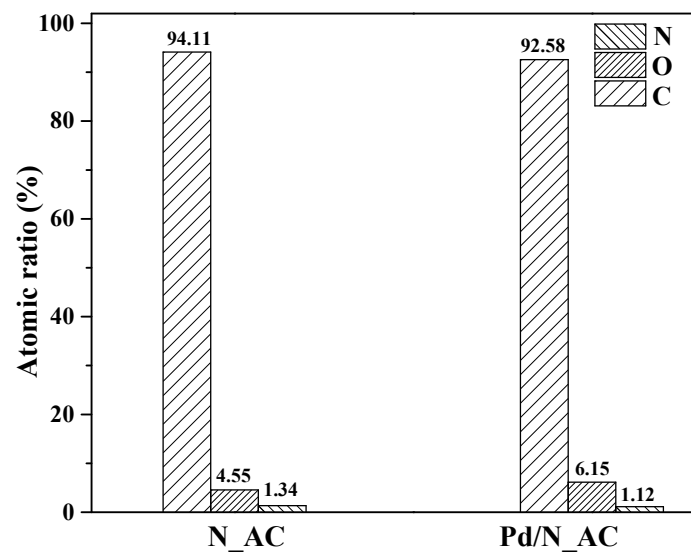

**Figure S3.** Total atomic concentration of N\_AC and Pd/N\_AC.

**Table S1** Element analysis results before and after Pd loading determined by CHN

| Sample  | C (wt.%) | H (wt.%) | N (wt.%) |
|---------|----------|----------|----------|
| N_AC    | 77.26    | 2.30     | 0.58     |
| Pd/N_AC | 77.14    | 2.30     | 0.53     |

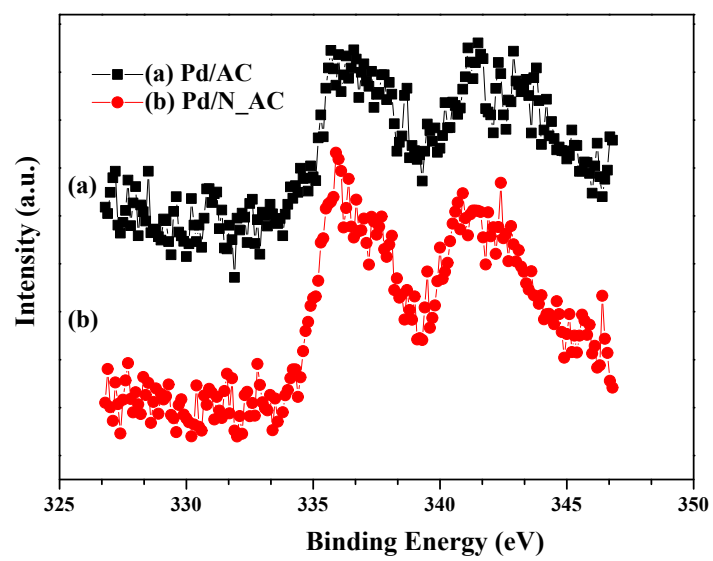

**Figure S4.** Pd3d XPS spectra of Pd/AC and (b) Pd/N\_AC.

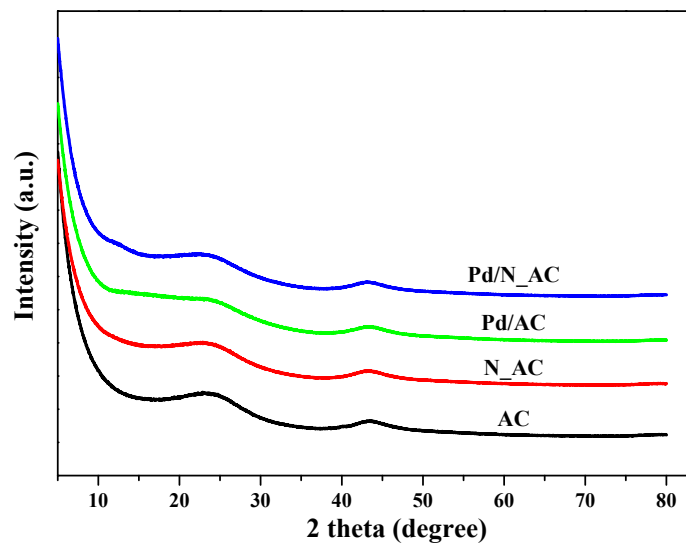

**Figure S5.** XRD patterns of supports and Pd catalysts.

XRD patterns in Figure S5 showed that the crystallinity and structures of AC retained after N doping and Pd loading. In addition, the absence of diffraction of Pd species implied that the Pd NPs were small or highly dispersed on supports.

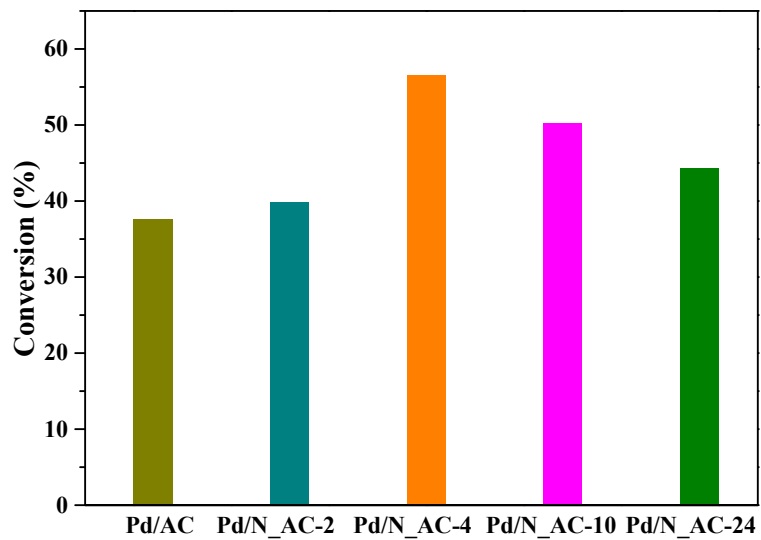

**Figure S6.** Catalytic activities of different N doped Pd catalysts for 4-CBA hydrogenation reaction. Reaction conditions: 4-CBA (0.15 g), 0.5% Pd catalyst (50 mg), H<sub>2</sub>O (50 ml), H<sub>2</sub> (0.8 MPa), 80 °C, 1 h.
